# Supplementary material
Source: Springer Nature journal article supplement (https://www.springermedizin.de/resource/supplementary/13049_2011_482_MOESM3_ESM.pdf/9666498)

## Major problems occurring in laypersons LMAS application

■ wrong/no    ■ correction of it

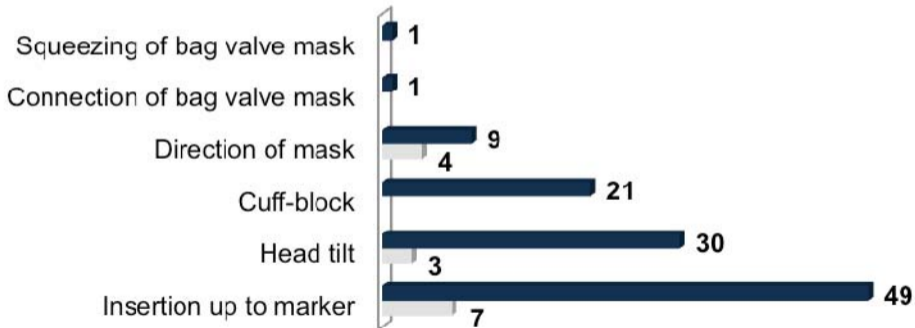

Supplement: MOESM3 [file 9666498]
